# Supplementary material for: Morphological Characteristics and Comparative Chloroplast Genome Analyses between Red and White Flower Phenotypes of Pyracantha fortuneana (Maxim.) Li (Rosaceae), with Implications for Taxonomy and Phylogeny
Source: MDPI journal article supplement (doi:10.3390/genes13122404), 2022-12-18
Supplement: s1 [file s1]

## Supplementary Materials

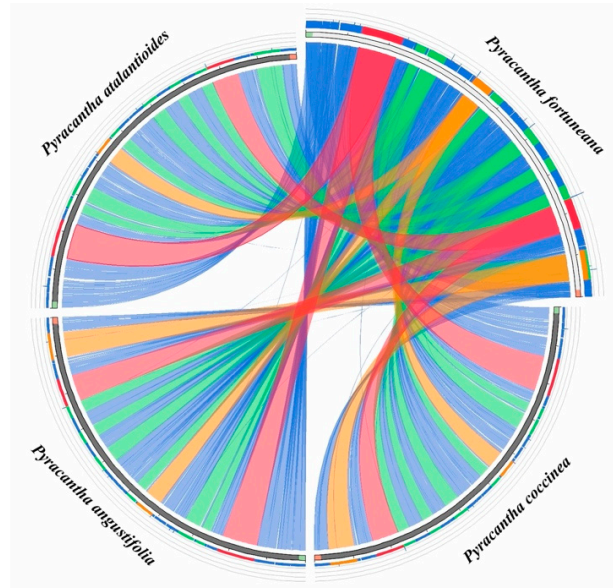

**Figure S1.** Synteny comparison among the chloroplast genomes of *P. fortuneana* and another three *Pyracantha* species. The colored blocks outside the sequences refer to the score/max bit core ration, with red > 0.75, orange > 0.50, green > 0.25, and blue  $\leq 0.25$ .

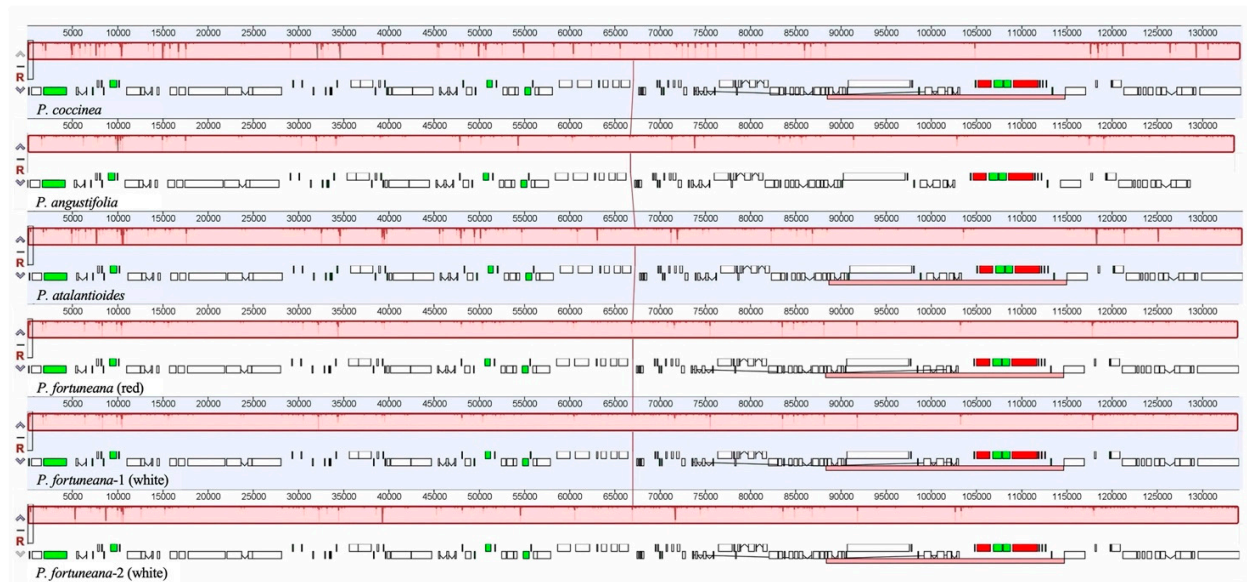

**Figure S2.** The structural rearrangement analysis of six *Pyracantha* chloroplast genomes using the mauve multiple alignment algorithm.

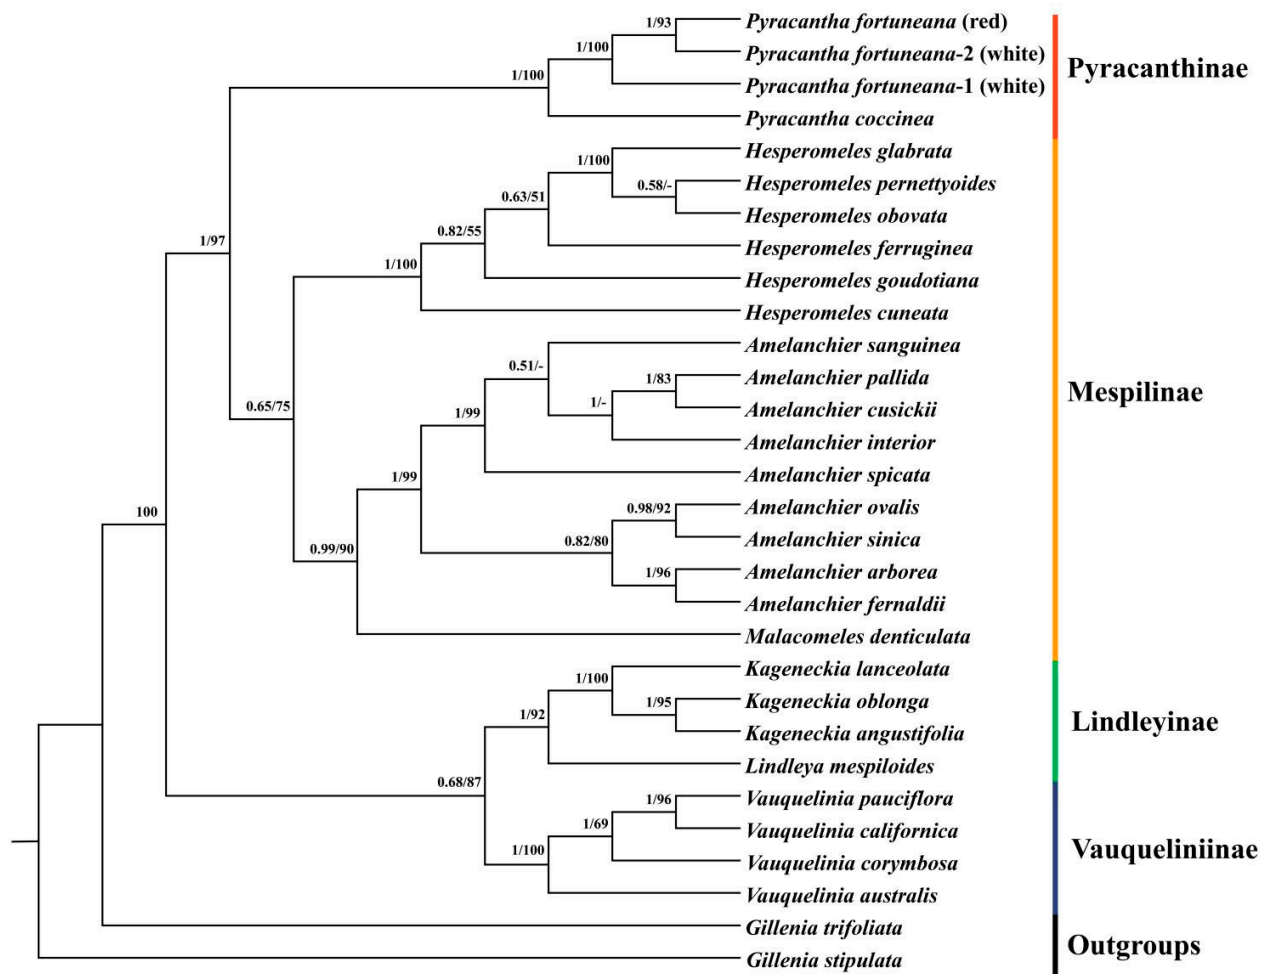

**Figure S3.** The phylogenetic tree of the genus *Pyracantha* based on 30 nrDNA ITS sequences using both ML and BI methods. The BI posterior probabilities / ML bootstrap values are displayed above the lines ("-" stands for the value less than 0.5/50).

**Table S1.** Sample list of chloroplast genomes used in this study.

| Species Name                      | Accession | Species Name                            | Accession |
|-----------------------------------|-----------|-----------------------------------------|-----------|
| <i>Amelanchier sinica</i>         | MK920291  | <i>Pyracantha fortuneana</i> -1 (white) | NC_059101 |
| <i>Malacomeles denticulata</i>    | NC_045325 | <i>Pyracantha fortuneana</i> -2 (white) | MW596361  |
| <i>Hesperomeles ferruginea</i>    | NC_045328 | <i>Pyracantha atalantioides</i>         | MW801001  |
| <i>Hesperomeles glabrata</i>      | MK920298  | <i>Vauquelinia australis</i>            | NC_045309 |
| <i>Hesperomeles obovata</i>       | MK920299  | <i>Vauquelinia californica</i>          | NC_062344 |
| <i>Hesperomeles goudotiana</i>    | NC_045327 | <i>Vauquelinia californica</i> -1       | KY419925  |
| <i>Hesperomeles pernettyoides</i> | NC_045329 | <i>Vauquelinia californica</i> -2       | MN068269  |
| <i>Crataegus cuneata</i>          | NC_058896 | <i>Vauquelinia corymbosa</i>            | MN068249  |
| <i>Crataegus pinnatifida</i>      | NC_057086 | <i>Kageneckia angustifolia</i>          | NC_045322 |
| <i>Crataegus hupehensis</i>       | NC_054155 | <i>Kageneckia crataegifolia</i>         | KY420027  |
| <i>Crataegus laevigata</i>        | NC_062347 | <i>Kageneckia oblonga</i>               | NC_045324 |
| <i>Crataegus rhipidophylla</i>    | NC_062345 | <i>Kageneckia lanceolata</i>            | MN068265  |
| <i>Crataegus kansuensis</i>       | NC_039374 | <i>Lindleya mespiloides</i>             | MN068248  |
| <i>Pyracantha coccinea</i>        | NC_062343 | <i>Gillenia stipulata</i>               | NC_045321 |
| <i>Pyracantha angustifolia</i>    | KY419957  | <i>Gillenia trifoliata</i>              | NC_045311 |

**Table S2.** Sample list of rDNA ITS sequences used in this study.

| Species Name                      | Accession | Species Name                                            | Accession   |
|-----------------------------------|-----------|---------------------------------------------------------|-------------|
| <i>Amelanchier sanguinea</i>      | MN905587  | <i>Lindleya mespiloides</i>                             | MN577906    |
| <i>Amelanchier pallida</i>        | MN905586  | <i>Kageneckia angustifolia</i>                          | MN905589    |
| <i>Amelanchier interior</i>       | MN905585  | <i>Kageneckia oblonga</i>                               | MN577932    |
| <i>Amelanchier fernaldii</i>      | MN905583  | <i>Kageneckia lanceolata</i>                            | MN068265    |
| <i>Amelanchier cusickii</i>       | MN905582  | <i>Malacomeles denticulata</i>                          | MN905591    |
| <i>Amelanchier arborea</i>        | MN905579  | <i>Pyracantha fortuneana</i> (red)                      | OP821228    |
| <i>Amelanchier ovalis</i>         | MN215988  | <i>Pyracantha fortuneana</i> -1 (white)                 | MN216013    |
| <i>Amelanchier sinica</i>         | MN216016  | <i>Pyracantha fortuneana</i> -2 (white)                 | SRR17631715 |
| <i>Amelanchier spicata</i>        | MN215976  | <i>Pyracantha coccinea</i>                              | SRR13004386 |
| <i>Hesperomeles pernettyoides</i> | MN905597  | <i>Vauquelinia californica</i> subsp. <i>sonorensis</i> | MN905593    |
| <i>Hesperomeles ferruginea</i>    | MN905596  | <i>Vauquelinia pauciflora</i>                           | MN905577    |
| <i>Hesperomeles goudotiana</i>    | MN905595  | <i>Vauquelinia corymbosa</i> subsp. <i>heterodon</i>    | MN905576    |
| <i>Hesperomeles cuneata</i>       | MN905594  | <i>Vauquelinia australis</i>                            | MN577917    |
| <i>Hesperomeles obovata</i>       | MN216004  | <i>Gillenia stipulata</i>                               | MN905588    |
| <i>Hesperomeles glabrata</i>      | MN216003  | <i>Gillenia trifoliata</i>                              | MN577923    |

**Table S3.** The codon number in six *Pyracantha* chloroplast genomes.

| Species                                 | Codons |
|-----------------------------------------|--------|
| <i>Pyracantha atalantioides</i>         | 26,288 |
| <i>Pyracantha angustifolia</i>          | 26,317 |
| <i>Pyracantha coccinea</i>              | 26,291 |
| <i>Pyracantha fortuneana</i> (red)      | 26,292 |
| <i>Pyracantha fortuneana</i> -1 (white) | 26,291 |
| <i>Pyracantha fortuneana</i> -2 (white) | 26,292 |

**Table S4.** List of the potential RNA editing sites in the chloroplast protein-coding genes of *Pyracantha fortuneana* (red) and two individuals of *P. fortuneana* (white).

| Nt Pos | AA Pos | Align Col | Effect             | Score | Gene         |
|--------|--------|-----------|--------------------|-------|--------------|
| 64     | 22     | 22        | CGG (R) => TGG (W) | 1     | <i>accD</i>  |
| 1463   | 488    | 519       | CCT (P) => CTT (L) | 1     | <i>accD</i>  |
| 773    | 258    | 258       | TCA (S) => TTA (L) | 1     | <i>atpA</i>  |
| 914    | 305    | 305       | TCA (S) => TTA (L) | 1     | <i>atpA</i>  |
| 1148   | 383    | 383       | TCA (S) => TTA (L) | 1     | <i>atpA</i>  |
| 37     | 13     | 13        | CCT (P) => TCT (S) | 1     | <i>atpB</i>  |
| 629    | 210    | 213       | TCA (S) => TTA (L) | 1     | <i>atpI</i>  |
| 559    | 187    | 187       | CAT (H) => TAT (Y) | 1     | <i>clpP</i>  |
| 634    | 212    | 227       | CAT (H) => TAT (Y) | 1     | <i>matK</i>  |
| 149    | 50     | 50        | TCA (S) => TTA (L) | 1     | <i>ndhB</i>  |
| 467    | 156    | 156       | CCA (P) => CTA (L) | 1     | <i>ndhB</i>  |
| 542    | 181    | 181       | ACG (T) => ATG (M) | 1     | <i>ndhB</i>  |
| 586    | 196    | 196       | CAC (H) => TAC (Y) | 1     | <i>ndhB</i>  |
| 737    | 246    | 246       | CCA (P) => CTA (L) | 1     | <i>ndhB</i>  |
| 746    | 249    | 249       | TCT (S) => TTT (F) | 1     | <i>ndhB</i>  |
| 830    | 277    | 277       | TCA (S) => TTA (L) | 1     | <i>ndhB</i>  |
| 1112   | 371    | 371       | TCA (S) => TTA (L) | 1     | <i>ndhB</i>  |
| 1255   | 419    | 419       | CAT (H) => TAT (Y) | 1     | <i>ndhB</i>  |
| 1481   | 494    | 494       | CCA (P) => CTA (L) | 1     | <i>ndhB</i>  |
| 383    | 128    | 128       | CCA (P) => CTA (L) | 1     | <i>ndhD</i>  |
| 599    | 200    | 200       | TCA (S) => TTA (L) | 1     | <i>ndhD</i>  |
| 674    | 225    | 225       | TCA (S) => TTA (L) | 1     | <i>ndhD</i>  |
| 878    | 293    | 293       | TCA (S) => TTA (L) | 1     | <i>ndhD</i>  |
| 290    | 97     | 97        | TCG (S) => TTG (L) | 1     | <i>ndhF</i>  |
| 392    | 131    | 131       | TCC (S) => TTC (F) | 1     | <i>ndhF</i>  |
| 1876   | 626    | 631       | CTT (L) => TTT (F) | 1     | <i>ndhF</i>  |
| 418    | 140    | 140       | CGG (R) => TGG (W) | 1     | <i>petB</i>  |
| 611    | 204    | 204       | CCA (P) => CTA (L) | 1     | <i>petB</i>  |
| 214    | 72     | 72        | CCT (P) => TCT (S) | 1     | <i>psbE</i>  |
| 77     | 26     | 26        | TCT (S) => TTT (F) | 1     | <i>psbF</i>  |
| 2      | 1      | 1         | ACG (T) => ATG (M) | 1     | <i>psbL</i>  |
| 830    | 277    | 279       | TCA (S) => TTA (L) | 1     | <i>rpoA</i>  |
| 338    | 113    | 113       | TCT (S) => TTT (F) | 1     | <i>rpoB</i>  |
| 566    | 189    | 190       | TCG (S) => TTG (L) | 1     | <i>rpoB</i>  |
| 1994   | 665    | 684       | TCT (S) => TTT (F) | 1     | <i>rpoB</i>  |
| 248    | 83     | 83        | TCA (S) => TTA (L) | 1     | <i>rps2</i>  |
| 80     | 27     | 27        | TCA (S) => TTA (L) | 1     | <i>rps14</i> |
| 149    | 50     | 53        | CCA (P) => CTA (L) | 1     | <i>rps14</i> |

**Table S5.** Summary of SSRs in six *Pyracantha* chloroplast genomes.

| Repeat types                    | A/T | C/G | AG/CT | AT/AT | AAAT/ATTT | AATT/AATT | AAGG C/CCTT G | AATCC/ATTGG | AATATT/AATATT | AACTAT/AGTTAT | Total |
|---------------------------------|-----|-----|-------|-------|-----------|-----------|---------------|-------------|---------------|---------------|-------|
| 3                               |     |     |       |       | 7         |           |               | 1           |               |               | 8     |
| 5                               |     |     | 1     | 15    |           |           |               |             |               |               | 16    |
| 6                               |     |     |       | 1     |           |           |               |             |               |               | 1     |
| 7                               |     |     |       | 1     |           |           |               |             |               |               | 1     |
| 10                              | 23  |     |       |       |           |           |               |             |               |               | 23    |
| 11                              | 11  | 2   |       |       |           |           |               |             |               |               | 13    |
| 12                              | 13  |     |       |       |           |           |               |             |               |               | 13    |
| 13                              | 7   |     |       |       |           |           |               |             |               |               | 7     |
| 14                              | 3   | 1   |       |       |           |           |               |             |               |               | 4     |
| 15                              | 4   |     |       |       |           |           |               |             |               |               | 4     |
| 16                              | 1   |     |       |       |           |           |               |             |               |               | 1     |
| 17                              | 2   |     |       |       |           |           |               |             |               |               | 2     |
| 18                              | 2   |     |       |       |           |           |               |             |               |               | 2     |
| 19                              | 1   |     |       |       |           |           |               |             |               |               | 1     |
| 25                              | 1   |     |       |       |           |           |               |             |               |               | 1     |
| Total                           | 68  | 3   | 1     | 17    | 7         | 0         | 0             | 1           | 0             | 0             | 97    |
| <i>Pyracantha angustifolia</i>  |     |     |       |       |           |           |               |             |               |               |       |
| 3                               |     |     |       |       | 7         | 1         |               | 1           |               | 1             | 10    |
| 5                               |     |     | 1     | 22    |           |           |               |             |               |               | 23    |
| 6                               |     |     |       | 4     |           |           |               |             |               |               | 4     |
| 10                              | 21  | 2   |       |       |           |           |               |             |               |               | 23    |
| 11                              | 9   | 1   |       |       |           |           |               |             |               |               | 10    |
| 12                              | 13  |     |       |       |           |           |               |             |               |               | 13    |
| 13                              | 5   |     |       |       |           |           |               |             |               |               | 5     |
| 14                              | 5   | 1   |       |       |           |           |               |             |               |               | 6     |
| 15                              | 2   |     |       |       |           |           |               |             |               |               | 2     |
| 16                              | 5   | 1   |       |       |           |           |               |             |               |               | 6     |
| 17                              | 5   |     |       |       |           |           |               |             |               |               | 5     |
| 18                              | 1   |     |       |       |           |           |               |             |               |               | 1     |
| 20                              | 1   |     |       |       |           |           |               |             |               |               | 1     |
| 24                              | 1   |     |       |       |           |           |               |             |               |               | 1     |
| 34                              | 1   |     |       |       |           |           |               |             |               |               | 1     |
| Total                           | 69  | 5   | 1     | 26    | 7         | 1         | 0             | 1           | 0             | 1             | 111   |
| <i>Pyracantha atalantioides</i> |     |     |       |       |           |           |               |             |               |               |       |
| 3                               |     |     |       |       | 6         | 1         |               | 1           | 1             |               | 9     |
| 4                               |     |     |       |       |           |           | 2             |             |               |               | 2     |
| 5                               |     |     | 1     | 20    |           |           |               |             |               |               | 21    |
| 6                               |     |     |       | 4     |           |           |               |             |               |               | 4     |
| 10                              | 21  |     |       |       |           |           |               |             |               |               | 21    |
| 11                              | 11  |     |       |       |           |           |               |             |               |               | 11    |

|       |    |   |   |    |   |   |   |   |   |   |     |
|-------|----|---|---|----|---|---|---|---|---|---|-----|
| 12    | 10 | 2 |   |    |   |   |   |   |   |   | 12  |
| 13    | 3  |   |   |    |   |   |   |   |   |   | 3   |
| 14    | 7  |   |   |    |   |   |   |   |   |   | 7   |
| 15    | 8  |   |   |    |   |   |   |   |   |   | 8   |
| 16    | 1  |   |   |    |   |   |   |   |   |   | 1   |
| 17    | 3  |   |   |    |   |   |   |   |   |   | 3   |
| 18    | 1  |   |   |    |   |   |   |   |   |   | 1   |
| 19    | 2  |   |   |    |   |   |   |   |   |   | 2   |
| Total | 67 | 2 | 1 | 24 | 6 | 1 | 2 | 1 | 1 | 0 | 105 |

*Pyracantha coccinea*

|       |    |   |   |    |   |   |   |   |   |   |     |
|-------|----|---|---|----|---|---|---|---|---|---|-----|
| 3     |    |   |   |    | 7 |   |   | 1 |   |   | 8   |
| 5     |    |   | 1 | 20 |   |   |   |   |   |   | 21  |
| 6     |    |   |   | 3  |   |   |   |   |   |   | 3   |
| 7     |    |   |   | 1  |   |   |   |   |   |   | 1   |
| 10    | 20 | 3 |   |    |   |   |   |   |   |   | 23  |
| 11    | 8  |   |   |    |   |   |   |   |   |   | 8   |
| 12    | 12 |   |   |    |   |   |   |   |   |   | 12  |
| 13    | 6  |   |   |    |   |   |   |   |   |   | 6   |
| 14    | 4  |   |   |    |   |   |   |   |   |   | 4   |
| 15    | 2  |   |   |    |   |   |   |   |   |   | 2   |
| 16    | 5  |   |   |    |   |   |   |   |   |   | 5   |
| 17    | 3  |   |   |    |   |   |   |   |   |   | 3   |
| 18    | 1  |   |   |    |   |   |   |   |   |   | 1   |
| 19    | 2  |   |   |    |   |   |   |   |   |   | 2   |
| 22    | 1  |   |   |    |   |   |   |   |   |   | 1   |
| 23    | 1  |   |   |    |   |   |   |   |   |   | 1   |
| Total | 65 | 3 | 1 | 24 | 7 | 0 | 0 | 1 | 0 | 0 | 101 |

*Pyracantha fortuneana* (red)

|       |    |   |   |    |   |   |   |   |  |  |     |
|-------|----|---|---|----|---|---|---|---|--|--|-----|
| 3     |    |   |   |    | 7 |   |   | 1 |  |  | 8   |
| 5     |    |   | 1 | 20 |   |   |   |   |  |  | 21  |
| 6     |    |   |   | 3  |   |   |   |   |  |  | 3   |
| 7     |    |   |   | 1  |   |   |   |   |  |  | 1   |
| 10    | 20 | 2 |   |    |   |   |   |   |  |  | 22  |
| 11    | 8  | 1 |   |    |   |   |   |   |  |  | 9   |
| 12    | 13 |   |   |    |   |   |   |   |  |  | 13  |
| 13    | 5  |   |   |    |   |   |   |   |  |  | 5   |
| 14    | 3  |   |   |    |   |   |   |   |  |  | 3   |
| 15    | 2  |   |   |    |   |   |   |   |  |  | 2   |
| 16    | 6  |   |   |    |   |   |   |   |  |  | 6   |
| 17    | 4  |   |   |    |   |   |   |   |  |  | 4   |
| 18    | 1  |   |   |    |   |   |   |   |  |  | 1   |
| 19    | 1  |   |   |    |   |   |   |   |  |  | 1   |
| 21    | 1  |   |   |    |   |   |   |   |  |  | 1   |
| 23    | 1  |   |   |    |   |   |   |   |  |  | 1   |
| Total | 65 | 3 | 1 | 24 | 7 | 0 | 0 | 1 |  |  | 101 |

*Pyracantha fortuneana*-1 (white)

Supplementary Material

|                                         |    |   |   |    |   |   |   |   |   |   |     |
|-----------------------------------------|----|---|---|----|---|---|---|---|---|---|-----|
| 3                                       |    |   |   |    | 7 |   |   | 1 |   |   | 8   |
| 5                                       |    |   | 1 | 23 |   |   |   |   |   |   | 24  |
| 6                                       |    |   |   | 2  |   |   |   |   |   |   | 2   |
| 7                                       |    |   |   | 1  |   |   |   |   |   |   | 1   |
| 10                                      | 19 | 2 |   |    |   |   |   |   |   |   | 21  |
| 11                                      | 11 | 1 |   |    |   |   |   |   |   |   | 12  |
| 12                                      | 16 |   |   |    |   |   |   |   |   |   | 16  |
| 13                                      | 2  |   |   |    |   |   |   |   |   |   | 2   |
| 14                                      | 5  | 1 |   |    |   |   |   |   |   |   | 6   |
| 15                                      | 4  |   |   |    |   |   |   |   |   |   | 4   |
| 16                                      | 5  |   |   |    |   |   |   |   |   |   | 5   |
| 17                                      | 1  |   |   |    |   |   |   |   |   |   | 1   |
| 20                                      | 1  |   |   |    |   |   |   |   |   |   | 1   |
| 21                                      | 2  |   |   |    |   |   |   |   |   |   | 2   |
| 22                                      | 1  |   |   |    |   |   |   |   |   |   | 1   |
| Total                                   | 67 | 4 | 1 | 26 | 7 | 0 | 0 | 1 | 0 | 0 | 106 |
| <i>Pyracantha fortuneana</i> -2 (white) |    |   |   |    |   |   |   |   |   |   |     |



**Table S6.** The neutral selected sites detected in the 78 CDSs of six *Pyracantha* chloroplast genomes.

| Rate estimate | LRT    | p-value | Gene        | Region | Rate estimate | LRT    | p-value | Gene         | Region |
|---------------|--------|---------|-------------|--------|---------------|--------|---------|--------------|--------|
| 189.581       | 1.307  | 0.2529  | <i>accD</i> | LSC    | 279.163       | 0.513  | 0.4739  | <i>petB</i>  | LSC    |
| 337.637       | 1.081  | 0.2984  |             |        | 277.363       | 0.631  | 0.4268  |              |        |
| 110.059       | 1.415  | 0.2342  | <i>atpA</i> | LSC    | 281.809       | -0.045 | 1       | <i>petL</i>  | LSC    |
| 118.066       | 1.91   | 0.167   |             |        | 148.181       | 0.403  | 0.5255  |              |        |
| 118.104       | 1.756  | 0.1852  | <i>ccsA</i> | SSC    | 219.006       | 0.483  | 0.4872  | <i>psaB</i>  | LSC    |
| 196.862       | 2.192  | 0.1387  | <i>cemA</i> | LSC    | 240.572       | 0.369  | 0.5434  |              |        |
| 202.472       | 0.223  | 0.6369  |             |        | 285.467       | 1.792  | 0.1807  | <i>psbA</i>  | LSC    |
| 138.283       | 0.377  | 0.539   | <i>matK</i> | LSC    | 254.254       | 2.681  | 0.1015  | <i>psbC</i>  | LSC    |
| 249.616       | -0.001 | 1       |             |        | 322.933       | 0.631  | 0.4271  | <i>psbK</i>  | LSC    |
| 140.031       | 1.352  | 0.245   | <i>ndhA</i> | SSC    | 221.789       | 2.031  | 0.1542  | <i>rpl14</i> | LSC    |
| 229.471       | 0.5    | 0.4794  | <i>ndhC</i> | SSC    | 241.761       | 0.824  | 0.3639  | <i>rpl32</i> | SSC    |
| 174.035       | 0.62   | 0.4309  |             |        | 196.116       | 1.123  | 0.2892  | <i>rpl33</i> | LSC    |
| 161.961       | 1.09   | 0.2965  | <i>ndhD</i> | SSC    | 368.073       | 0.736  | 0.3911  | <i>rpoA</i>  | LSC    |
| 141.525       | 0.427  | 0.5136  |             |        | 194.096       | 2.568  | 0.1091  | <i>rps11</i> | LSC    |
| 157.918       | 0.951  | 0.3294  |             |        | 199.376       | 1.308  | 0.2528  | <i>rps12</i> | IR     |
| 0.008         | -0.034 | 1       |             |        | 342.758       | 0.681  | 0.4094  | <i>rps15</i> | SSC    |
| 219.006       | 0.483  | 0.4872  |             |        | 266.225       | 0.556  | 0.456   | <i>rps18</i> | LSC    |
| 324.996       | 0.579  | 0.4467  | <i>ndhF</i> | SSC    | 309.785       | 2.234  | 0.135   | <i>ycf2</i>  | IR     |
| 374.718       | 2.502  | 0.1137  |             |        | 271.046       | 0.535  | 0.4646  | <i>ycf3</i>  | LSC    |
| 250.479       | 1.343  | 0.2465  |             |        | 264.924       | 0.514  | 0.4733  |              |        |
| 238.061       | 0.599  | 0.4389  | <i>ndhJ</i> | LSC    | 468.867       | 0.432  | 0.511   | <i>rpoC2</i> | LSC    |
